# Supplementary material for: Microwave-assisted hydrothermal synthesis and spectroscopic characteristics of a Lu4Hf3O12:Pr scintillator
Source: Royal Society of Chemistry journal article supplement (doi:10.1039/c6ra04807b), 2016-01-01
Supplement: c6ra04807b1.pdf [file c6ra04807b1.pdf]

Project: 09.06.2011

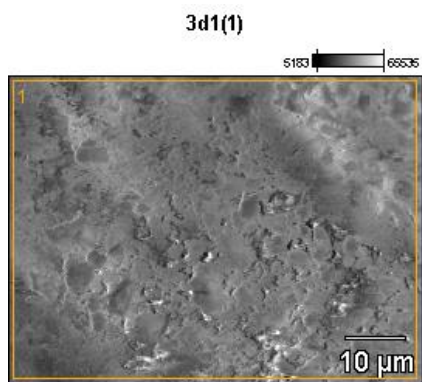

Image Name: 3d1(1)

Accelerating Voltage: 30.0 kV

Magnification: 1800

Full scale counts: 434552

3d1(1)\_pt1

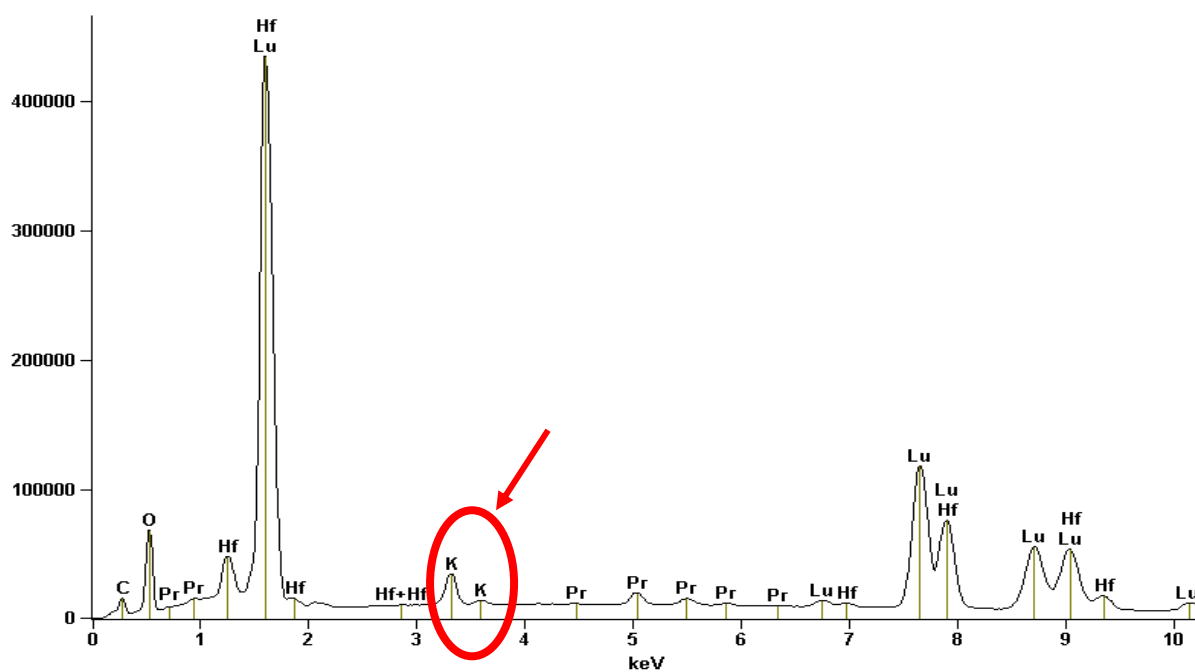

Quantitative Results for: 3d1(1)\_pt1

| <i>Element Line</i> | <i>Weight %</i> | <i>Atom %</i> |
|---------------------|-----------------|---------------|
| <i>C K</i>          | 2.88            | 13.45         |
| <i>O K</i>          | 16.75           | 58.70         |
| <i>Cl K</i>         | 0.04            | 0.06          |
| <i>Cl L</i>         | ---             | ---           |
| <i>K K</i>          | 1.90            | 2.73          |
| <i>K L</i>          | ---             | ---           |
| <i>Pr L</i>         | 1.60            | 0.64          |
| <i>Pr M</i>         | ---             | ---           |
| <i>Ho L</i>         | 0.03            | 0.01          |
| <i>Ho M</i>         | ---             | ---           |
| <i>Lu L</i>         | 46.03           | 14.75         |
| <i>Lu M</i>         | ---             | ---           |
| <i>Hf L</i>         | 30.74           | 9.66          |
| <i>Hf M</i>         | ---             | ---           |
| <i>Re L</i>         | 0.02            | 0.01          |
| <i>Re M</i>         | ---             | ---           |
| <b>Total</b>        | <b>100.00</b>   | <b>100.00</b> |
